# Supplementary material
Source: PubMed Central journal article supplement (PMC5912952)
Supplement: NIHMS959628-supplement-supplemental_digital_content.pdf [file NIHMS959628-supplement-supplemental_digital_content.pdf]

## Supplemental Digital Appendix 1

### Scoring Instrument Used to Assess Characteristics and Quality Measures of Operating Room to Intensive Care Unit Handoffs, Surgical Service, Hospital of the University of Pennsylvania, July 2014–January 2015

Video ID:

#### Number of People in Room Upon Patient Entry

*Transferring Team*

Anesthesia\*: \_\_\_\_\_

Surgery\*: \_\_\_\_\_

*Receiving Critical Care Team*

Providers\*: \_\_\_\_\_

Nurses: \_\_\_\_\_

\*Includes attendings, fellows, residents, nurse practitioners, and medical students.

#### Basic Handoff Characteristics

Patient Entry Time: \_\_\_\_\_

Time Last Provider Exits Room (with no return in subsequent 5 minutes): \_\_\_\_\_

#### Handoff Reports

|    | Report Transmitter(s) | Report Receiver(s) | Start Time | End Time |
|----|-----------------------|--------------------|------------|----------|
| 1) |                       |                    |            |          |
| 2) |                       |                    |            |          |

*Continue on back if there were more than 2 reports.*

#### Physical Examination

For the following questions, circle yes if a wound check, pulse check, auscultation, or hands-on exam maneuver was performed.

Was the patient examined a receiving **critical care provider**? **Yes** **No**

Was the patient examined by a **nurse**? **Yes** **No**

#### Handoff Quality Measures

##### Teamwork

**Task Prioritization:** Were the equipment and physical handover of the patient as well as any immediate patient care needs taken care of prior to information handover (excluding essential information)?

**Yes**

**No, explain:**

**Clear Role Identification:** During the information handover, were the report transmitter(s) and report receiver(s) clearly identified?

**Yes**

**No, explain:**

**Attention to Reports:** During the information handover, were the transmitter(s) and receiver(s) attending solely to the conversation? Circle no if they were engaging in other tasks or side conversation.

**Yes**

**No, explain:**

**Coordination of Reports:** If there were handoff reports from both surgery and anesthesia, were they given sequentially? Circle no if the handoffs were transmitted simultaneously to different receivers in different parts of the room.

**N/A** (reports were not given by both surgery and anesthesia)

**Yes**

**No, explain:**

**Transmitter Collaboration:** If there were handoff reports from both surgery and anesthesia, were they present and listening to each other's report? Circle no if the other transmitter was present but busy assisting with patient care.

**N/A** (reports were not given by both surgery and anesthesia)

**Yes**

**No, explain:**

### **Transmitter Report Delivery Skills**

Circle one rating for the primary transmitter in each category.

#### **Surgery**

Superior

Satisfactory

Unsatisfactory

#### **Anesthesia**

Superior

Satisfactory

Unsatisfactory

Explain evaluation for surgery:

Explain evaluation for anesthesia:

### **Handoff Engagement**

Circle one rating for the primary transmitter or recipient in each category.

#### **Surgery:**

Superior

Satisfactory

Unsatisfactory

#### **Anesthesia:**

Superior

Satisfactory

Unsatisfactory

#### **Critical Care Provider:**

Superior

Satisfactory

Unsatisfactory

#### **Nurse:**

Superior

Satisfactory

Unsatisfactory

Explain evaluation for surgery:

Explain evaluation for anesthesia:

Explain evaluation for critical care provider:

Explain evaluation for nurse:

### Receiver Listening Skills

List job title (e.g. nurse, ICU physician) of primary receiver for each report.

Circle yes if the behavior is demonstrated at least once during the report.

|                                    | Receiver of Report 1: _____ | Receiver of Report 2: |
|------------------------------------|-----------------------------|-----------------------|
| <hr/>                              |                             |                       |
| <i>Eye Contact</i>                 | Yes No Unknown              | Yes No Unknown        |
| <i>Affirmative Statement(s)</i>    | Yes No Unknown              | Yes No Unknown        |
| <i>Head Nod(s)</i>                 | Yes No Unknown              | Yes No Unknown        |
| <i>Note-taking</i>                 | Yes No Unknown              | Yes No Unknown        |
| <i>Question-asking/Interactive</i> | Yes No Unknown              | Yes No Unknown        |

*Continue on back if there were more than 2 reports.*

### Other

List and describe **any interruptions** during the handoff reports:

List and describe **any unprofessional acts or comments** during the video recording:

Any additional comments:
